# Supplementary material for: Safety and Efficacy Associated With a Family-Centered Procedural Sedation Protocol for Children With Autism Spectrum Disorder or Developmental Delay
Source: PubMed Central journal article supplement (PMC10230313; doi:10.1001/jamanetworkopen.2023.15974), 2023-05-30
Supplement: jamanetwopen-e2315974-s002.pdf [file jamanetwopen-e2315974-s002.pdf]

## Data Sharing Statement

### Data

**Data available:** Yes

**Data types:** Deidentified participant data, Data dictionary

**How to access data:** [cyril.sahyoun@hcuge.ch](mailto:cyril.sahyoun@hcuge.ch)

**When available:** With publication

### Supporting Documents

**Document types:** None

### Additional Information

**Who can access the data:** researchers whose proposed use of the data has been approved by an ethics committee

**Types of analyses:** For the purpose of further research on the topic

**Mechanisms of data availability:** with a signed data access agreement
